# Supplementary material for: Follow-up focused on psychological intervention initiated after intensive care unit in adult patients and informal caregivers: a systematic review and meta-analysis
Source: PeerJ. 2023 Jun 9;11:e15260. doi: 10.7717/peerj.15260 (PMC10259442; doi:10.7717/peerj.15260)
Supplement: Data S1 [file peerj-11-15260-s009.xlsx]

## Sheet: Included full text
Study ID	Main article	Publication	Quantitative analysis	Title of records, or Registration	Authors of publication	Title of publication	Citation of publication	PMID of publication	Clinical trial registration ID	Type of study	Correspondence to
Kredentser 2019	1	1	1	Preventing Mental Health Symptoms in Post ICU Patients and Their Family Members	Maia S Kredentser, Marcus Blouw, Nicole Marten, Jitender Sareen, O Joseph Bienvenu, Jennifer Ryu, Brooke E Beatie, Sarvesh Logsetty, Lesley A Graff, Shauna Eggertson, Sophia Sweatman, Braeden Debroni, Nina Cianflone, Rakesh C Arora, Ryan Zarychanski, Kendiss Olafson	Preventing Posttraumatic Stress in ICU Survivors: A Single-Center Pilot Randomized Controlled Trial of ICU Diaries and Psychoeducation	Crit Care Med. 2018 Dec;46(12):1914-1922.	30119073	NCT02067559	randomised trial	umkreden@myumanitoba.ca
Cox 2018	1	1	1	Effects of a Telephone- and Web-based Coping Skills Training Program Compared with an Education Program for Survivors of Critical Illness and Their Family Members. A Randomized Clinical Trial	Christopher E Cox, Catherine L Hough, Shannon S Carson, Douglas B White, Jeremy M Kahn, Maren K Olsen, Derek M Jones, Tamara J Somers, Sarah A Kelleher, Laura S Porter	Effects of a Telephone- and Web-based Coping Skills Training Program Compared with an Education Program for Survivors of Critical Illness and Their Family Members. A Randomized Clinical Trial	Am J Respir Crit Care Med. 2018 Jan 1;197(1):66-78.	28872898	NCT01983254	randomised trial	christopher.cox@duke.edu
Cox 2019	1	1	1	Effects of mindfulness training programmes delivered by a self-directed mobile app and by telephone compared with an education programme for survivors of critical illness: a pilot randomised clinical trial	Christopher E Cox, Catherine L Hough, Derek M Jones, Anna Ungar, Wen Reagan, Mary D Key, Tina Gremore, Maren K Olsen, Linda Sanders, Jeffrey M Greeson, Laura S Porter	Effects of mindfulness training programmes delivered by a self-directed mobile app and by telephone compared with an education programme for survivors of critical illness: a pilot randomised clinical trial	Thorax. 2019 Jan;74(1):33-42.	29793970	NCT02701361	randomised trial	christopher.cox@duke.edu
Cuthbertson 2009	1	1	1	The PRaCTICaL study of nurse led, intensive care follow-up programmes for improving long term outcomes from critical illness: a pragmatic randomised controlled trial	B H Cuthbertson, J Rattray, M K Campbell, M Gager, S Roughton, A Smith, A Hull, S Breeman, J Norrie, D Jenkinson, R Hernández, M Johnston, E Wilson, C Waldmann, PRaCTICaL study group	The PRaCTICaL study of nurse led, intensive care follow-up programmes for improving long term outcomes from critical illness: a pragmatic randomised controlled trial	BMJ. 2009 Oct 16;339:b3723.	19837741	ISRCTN24294750	randomised trial	brian.cuthbertson@sunnybrook.ca.
Daly 2005	1	1	1	Trial of a disease management program to reduce hospital readmissions of the chronically critically ill	Barbara J Daly, Sara L Douglas, Carol Genet Kelley, Elizabeth O'toole, Hugo Montenegro	Trial of a disease management program to reduce hospital readmissions of the chronically critically ill	Chest. 2005 Aug;128(2):507-17.	16100132	0	randomised trial	barbara.daly@case.edu
Cuthbertson 2009	0	1	1	Lift Mobile Mindfulness for COVID-19 Distress Symptoms	R A Hernández, D Jenkinson, L Vale, B H Cuthbertson	Economic evaluation of nurse-led intensive care follow-up programmes compared with standard care: the PRaCTICaL trial	Eur J Health Econ. 2014 Apr;15(3):243-52.	23535984	ISRCTN24294750	sub-analysis of RCT	luke.vale@newcastle.ac.uk
Jensen 2016	1	1	1	A recovery program to improve quality of life, sense of coherence and psychological health in ICU survivors: a multicenter randomized controlled trial, the RAPIT study	Janet F Jensen, Ingrid Egerod, Morten H Bestle, Doris F Christensen, Ask Elklit, Randi L Hansen, Heidi Knudsen, Louise B Grode, Dorthe Overgaard		Intensive Care Med. 2016 Nov;42(11):1733-1743.	27695894	NCT01721239	randomised trial	janet.froulund.jensen@regionh.dk
McWilliams 2016	1	1	1	Outpatient-based physical rehabilitation for survivors of prolonged critical illness: A randomized controlled trial	David J McWilliams, Steve Benington, Dougal Atkinson	Outpatient-based physical rehabilitation for survivors of prolonged critical illness: A rA recovery program to improve quality of life, sense of coherence and psychological health in ICU survivors: a multicenter randomized controlled trial, the RAPIT studyandomized controlled trial	Physiother Theory Pract. 2016;32(3):179-90.	27043264	NCT02491021	randomised trial	David.mcwilliams@uhb.nhs.uk
Rohr 2021	0	0	0	Piloting an ICU follow-up clinic to improve health-related quality of life in ICU survivors after a prolonged intensive care stay (PINA): study protocol for a pilot randomised controlled trial	0	0	0	0	NCT04186468	randomised trial	magdalena.rohr@ukr.de
Schmidt 2016	1	1	1	Effect of a Primary Care Management Intervention on Mental Health-Related Quality of Life Among Survivors of Sepsis: a Randomized Clinical Trial	Konrad Schmidt, Susanne Worrack, Michael Von Korff, Dimitry Davydow, Frank Brunkhorst, Ulrike Ehlert, Christine Pausch, Juliane Mehlhorn, Nico Schneider, André Scherag, Antje Freytag, Konrad Reinhart, Michel Wensing, Jochen Gensichen, SMOOTH Study Group	Effect of a Primary Care Management Intervention on Mental Health–Related Quality of Life Among Survivors of Sepsis A Randomized Clinical Trial	JAMA. 2016 Jun 28;315(24):2703-11.	27367877	ISRCTN61744782	randomised trial	jochen .gensichen@med.uni-jena.de
Schmidt 2016	0	1	1	Long-Term Courses of Sepsis Survivors: effects of a Primary Care Management Intervention	Konrad Fr Schmidt, Daniel Schwarzkopf, Laura-Mae Baldwin, Frank M Brunkhorst, Antje Freytag, Christoph Heintze, Konrad Reinhart, Nico Schneider, Michael von Korff, Susanne Worrack, Michel Wensing, Jochen Gensichen, SMOOTH Study Group	Long-term courses of sepsis survivors: effects of a primary care management intervention	Am J Med. 2020 Mar;133(3):381-385.e5.	31521666	ISRCTN61744782	sub-analysis of RCT	Konrad.Schmidt@charite.de
Abdelhamid 2021	1	1	1	Survivors of intensive care with type 2 diabetes and the effect of shared care follow-up clinics: the SWEET-AS randomized controlled pilot study	Yasmine Ali Abdelhamid, Liza K Phillips, Mary G White, Jeffrey Presneill, Michael Horowitz, Adam M Deane	Survivors of Intensive Care With Type 2 Diabetes and the Effect of Shared-Care Follow-Up Clinics: The SWEET-AS Randomized Controlled Pilot Study	Chest. 2021 Jan;159(1):174-185.	32800818	ACTRN12616000206426	randomised trial	yasmine.aliabdelhamid@mh.org.au
Haines 2018	0	0	0	Testing a Peer Support Program for Intensive Care Unit Survivors to improve Psychological Recovery - Pilot Randomized Controlled Trial	0	0	0	0	ACTRN12618000615280	randomised trial	kimberley.haines@wh.org.au
Ågren 2018	1	1	1	The health promoting conversations intervention for families with a critically ill relative: A pilot study	S Ågren, A Eriksson, M Fredrikson, G Hollman-Frisman, L Orwelius	The health promoting conversations intervention for families with a critically ill relative: A pilot study	Intensive Crit Care Nurs. 2019 Feb;50:103-110.	29731406	NCT03325049	randomised trial	Susanna.Agren@liu.se
Bloom 2019	1	1	1	Randomized Clinical Trial of an ICU Recovery Pilot Program for Survivors of Critical Illness	Sarah L Bloom, Joanna L Stollings, Olivia Kirkpatrick, Li Wang, Daniel W Byrne, Carla M Sevin, Matthew W Semler	Randomized Clinical Trial of an ICU Recovery Pilot Program for Survivors of Critical Illness	Crit Care Med. 2019 Oct;47(10):1337-1345.	31385881	NCT03124342	randomised trial	sarah.l.bloom@vumc.org
Jensen 2016	0	1	1	Recovery programme for ICU survivors has no effect on relatives' quality of life: Secondary analysis of the RAPIT-study	Søs Bohart, Ingrid Egerod, Morten H Bestle, Dorthe Overgaard, Doris F Christensen, Janet F Jensen	Reprint of Recovery programme for ICU survivors has no effect on relatives' quality of life: Secondary analysis of the RAPIT-study	Intensive Crit Care Nurs. 2019 Feb;50:111-117.	30522822	NCT03264365	sub-analysis of RCT	soes.bohart@regionh.dk
Daly 2005	1	1	1	Impact of a disease management program upon caregivers of chronically critically ill patients	Sara L Douglas, Barbara J Daly, Carol Genet Kelley, Elizabeth O'Toole, Hugo Montenegro	Impact of a Disease Management Program Upon Caregivers of Chronically Critically Ill Patients	Chest. 2005 Dec;128(6):3925-36.	16354865	0	randomised trial	SLD4@case.edu
Daly 2005	0	1	1	Chronically critically ill patients: health-related quality of life and resource use after a disease management intervention	Sara L Douglas, Barbara J Daly, Carol Genet Kelley, Elizabeth O'Toole, Hugo Montenegro	Chronically critically ill patients: health-related quality of life and resource use after a disease management intervention	Am J Crit Care. 2007 Sep;16(5):447-57.	17724242	0	randomised trial	SLD4@case.edu
Ewens 2019	0	0	0	A Web-Based Recovery Program (ICUTogether) for Intensive Care Survivors: Protocol for a Randomized Controlled Trial	0	0	0	0	PRR1-10.2196/10935	randomised trial	b.ewens@ecu.edu.au
Jones 2003	1	1	1	Post-traumatic stress disorder-related symptoms in relatives of patients following intensive care	Christina Jones, Paul Skirrow, Richard D Griffiths, Gerrald Humphris, Sarah Ingleby, Jane Eddleston, Carl Waldmann, Melanie Gager	Post-traumatic stress disorder-related symptoms in relatives of patients following intensive care	Intensive Care Med. 2004 Mar;30(3):456-60.	14767589	0	randomised trial	christinajonesc@aol.com
Jones 2003	1	1	1	Rehabilitation after critical illness: a randomized, controlled trial	Christina Jones, Paul Skirrow, Richard D Griffiths, Gerald H Humphris, Sarah Ingleby, Jane Eddleston, Carl Waldmann, Melanie Gager	Rehabilitation after critical illness: A randomized, controlled trial	Crit Care Med. 2003 Oct;31(10):2456-61.	14530751	0	randomised trial	christinajonesc@aol.com
Kentish-Barnes 2017	1	1	1	Effect of a condolence letter on grief symptoms among relatives of patients who died in the ICU: a randomized clinical trial	Nancy Kentish-Barnes, Sylvie Chevret, Benoît Champigneulle, Marina Thirion, Virginie Souppart, Marion Gilbert, Olivier Lesieur, Anne Renault, Maïté Garrouste-Orgeas, Laurent Argaud, Marion Venot, Alexandre Demoule, Olivier Guisset, Isabelle Vinatier, Gilles Troché, Julien Massot, Samir Jaber, Caroline Bornstain, Véronique Gaday, René Robert, Jean-Philippe Rigaud, Raphaël Cinotti, Mélanie Adda, Fr…	Effect of a condolence letter on grief symptoms among relatives of patients who died in the ICU: a randomized clinical trial	Intensive Care Med. 2017 Apr;43(4):473-484.	28197680	NCT02325297	randomised trial	elie.azoulay@aphp.fr
Boehm 2019	0	0	0	Telehealth-Enhanced Patient-Oriented Recovery Trajectory After ICU	0	0	0	0	NCT03926533	randomised trial	leanne.boehm@vanderbilt.edu
Vlake 2021	1	1	1	Intensive Care specific Virtual Reality (ICU-VR) improves Post-Intensive Care Syndrome-related psychological sequelae in survivors of critical illness	Johan H Vlake, Jasper Van Bommel, Evert-Jan Wils, Tim I M Korevaar, O Joseph Bienvenu, Eva Klijn, Diederik Gommers, Michel E van Genderen	Virtual Reality to Improve Sequelae of the Postintensive Care Syndrome: A Multicenter, Randomized Controlled Feasibility Study	Crit Care Explor. 2021 Sep 14;3(9):e0538.	34549192	NL6611	randomised trial	j.vlake@erasmusmc.nl
Valsø 2020	1	1	1	Effect of Nurse-Led Consultations on Post-Traumatic Stress and Sense of Coherence in Discharged ICU Patients With Clinically Relevant Post-Traumatic Stress Symptoms-A Randomized Controlled Trial	Åse Valsø, Tone Rustøen, Milada Cvancarova Småstuen, Øivind Ekeberg, Laila Skogstad, Inger Schou-Bredal, Hilde Myhren, Kjetil Sunde, Kirsti Tøien	Effect of Nurse-Led Consultations on Post-Traumatic Stress and Sense of Coherence in Discharged ICU Patients With Clinically Relevant Post-Traumatic Stress Symptoms—A Randomized Controlled Trial	Crit Care Med. 2020 Dec;48(12):e1218-e1225.	33048906	NCT02077244	randomised trial	ase.valso@gmail.com
Moulaert 2015	1	1	1	Early neurologically-focused follow-up after cardiac arrest improves quality of life at one year A randomised controlled trial	Véronique R M Moulaert, Caroline M van Heugten, Bjorn Winkens, Wilbert G M Bakx, Marc C F T M de Krom, Ton P M Gorgels, Derick T Wade, Jeanine A Verbunt	Early neurologically-focused follow-up after cardiac arrest improves quality of life at one year: A randomised controlled trial	Int J Cardiol. 2015 Aug 15;193:8-16.	26005166	ISRCTN74835019	randomised trial	v.r.m.moulaert@umcg.nl
Ojeda 2021	0	0	0	Early Care, Therapeutic Education, and Psychological Intervention for the Management of Post-intensive Care Syndrome and Chronic Pain After Coronavirus Disease 2019 Infection. Simple-blind, Controlled, Randomized Trial.	0	0	0	0	NCT04394169	randomised trial	macalvo@clinic.cat
Cox 2020b	0	0	0	Optimizing a Self-directed Mobile Coping Skills Training Intervention to Improve Cardiorespiratory Failure Survivors' Psychological Distress	0	0	0	0	NCT04329702	randomised trial	Christopher.cox@duke.edu
Malik 2018	0	0	0	A Pilot, Feasibility Randomized Controlled Trial of a Behavioral Activation And Rehabilitation Intervention To Improve Psychological And Physical Impairments In Acute Respiratory Failure Survivors	0	0	0	0	NCT03431493	randomised trial	amalik37@jhmi.edu
Gawlytta 2020	1	1	0	Internet-based cognitive-behavioural writing therapy for reducing post-traumatic stress after intensive care for sepsis in patients and their spouses (REPAIR): study protocol for a randomised-controlled trial	Romina Gawlytta, Miriam Kesselmeier, André Scherag, Helen Niemeyer, Maria Böttche, Christine Knaevelsrud, Jenny Rosendahl	Internet-based Cognitive-behavioral Writing Therapy for Reducing Posttraumatic Stress After Severe Sepsis in Patients and Their Spouses (REPAIR): Results of a Randomized Controlled Trial	https://doi.org/10.21203/rs.3.rs-74259/v1	0	Pre-results, DRKS00010676	randomised trial	jenny.rosendahl@med.uni-jena.de
Gawlytta 2020	0	1	0	Internet-based cognitive-behavioural writing therapy for reducing post-traumatic stress after intensive care for sepsis in patients and their spouses (REPAIR): results of two pilot cases	0	0	0	0	0	randomised trial	0
Gawlytta 2020	0	1	0	Internet-based cognitive-behavioral writing therapy reduces post-traumatic stress after intensive care in patients and their spouses: First results of the REPAIR trial	0	0	0	0	0	randomised trial	0
Khan 2018	0	0	0	Mobile Critical Care Recovery Program for Acute Respiratory Failure Survivors	0	0	0	0	NCT03053245	randomised trial	sikhan@iu.edu
Chen 2022	0	0	0	Effects of MBSR therapy on negative emotions, fatigue, and sleep quality in "post-ICU patients": A randomized controlled clinical trial protocol	0	0	0	0	DOI 10.17605/ OSF.IO/PD7SU	randomised trial	chendenchen@126.com
Friedman 2022	0	0	0	Study in Intensive Care Follow-up Programme in Improving Long-term Outcomes of ICU Survivors	0	0	0	0	NCT01796509	randomised trial	tsharshar@gmail.com

## Sheet: PICO
	Criteria				Intervention/control									Definition of outcomes
Study ID	Inclusion criteria	Excluded criteria	Inclusion criteria_F	Excluded criteria_F	Intervention1	Intervention2	Control	Intervention_F	Control_F		Category of intervention	The presense of psychologist	Detail_psychological intervention	Definition_significant symptoms of depression	Depression_Measured time point	Depression_Unit_Measured time point	Depression_Timing of follow-up	Depression_Detail_other_timing		Definition_significant symptoms of PTSD	PTSD_Measured time point	PTSD_Unit_Measured time point	PTSD_Timing of follow-up	PTSD_Detail_other_timing		Definition_All adverse events		Definition_significant symptoms of Anxiety	Anxiety_Measured time point	Anxiety_Unit_Measured time point	Anxiety_Timing of follow-up	Anxiety_Detail_other_timing		Definition_HRQoL	HRQoL_Measured time point	HRQoL_Unit_Measured time point	HRQoL_Timing of follow-up	HRQoL_Detail_other_timing		Definition_Pain	Pain_Measured time point	Pain_Unit_Measured time point	Pain_Timing of follow-up	Pain_Detail_other_timing		Readmission_Measured time point	Readmission_Unit_Measured time point	Readmission_Timing of follow-up	Readmission_Detail_other_timing
Abdelhamid 2021	Type 2 diabetes ICU stay of ≥5 days Surviver to ICU discharge	Age >85 years Pregnancy Major psychiatric illness Residing >50km from hospital Anticipated death within six months of ICU discharge as determined by the treating intensivist			In-hospital Provided by a multidisciplinary inpatient medical or surgical team (as control). Out-hospital Visits forllow-up clinics by intensivists and endocrinologists. Intensivist; Assessment of ICU-aquired problems, such as pain, cognition, and communication. Screen for anxiety and depression. Endocrinologist; review of blood glucose, medication review, and cardiovascular risk assessment. Dura…		In hospital Provided by a multidisciplinary inpatient medical or surgical team, which consists of doctors, nurses and allied health practitioners. Prior to the initiation of this study, no formal ICU follow-up service or clinic existed in the hospital. Out hospital As need as supports; to another acute care hospital closer to the patient’s home; to an inpatient rehabilitation hospital; or to a te…				monitoring	No	As need as psychology clinic	Anxiety/depression: Anxiety/depression items of EQ-5D-5L	6	Months	Hospital discharge																	Mental component summary of SF-36	6	Months	Hospital discharge			Bodily pain of SF-36	6	Months	Hospital discharge			6	Months	Hospital discharge
Ågren 2018	Adults (>18 years) Admission to the ICU ≥ 72 h. Participating in at least one family member (age >15 years). Ability to sign an informed consent form	Cognitive impairment Severe psychiatric disorders Drug abuse Difficulties in understanding or reading the Swedish	Ability to sign an informed consent form					The Health Promoting Conversations intervention Patients received traditional care with follow-up visits and a health-promoting conversation by nurses and families. Conversation about experience of the current situation. important topics for each family, available resources. Duration and Frecuency: From Three weeks after ICU discharge. 2 weeks interval, within an approximately 4 to 8 week after h…	Patients received traditional care with follow-up visits, according to national guidelines. Although familes were permitted to follow the patients to appointments, they were not always visited.		monitoring	No	not detail																					Mental component summary of SF-36	12	Months	ICU discharge	critical illness
Bloom 2019	Adult (≥18 years) Admission to the medical ICU ICU stay of at least 48 hours Estimated risk of 30-day same-hospital readmission > 15%	Long-term residence at a skilled nursing facility Long-term mechanical ventilation prior to ICU admission Prior receipt of solid organ or stem cell transplantation Recorded primary residency greater than 200 miles from the study hospital A care plan focused primarily on patient comfort; or previous enrollment in the study			Intervention by multidisciplinary team from ICU discharge. In-hospital Education by Visits and pamphlet of ICU nurse practionor; Medication reconciliation by ICU pharmacist. Out-hospital Provide a phone number for direct access to ICU recovery program team; Evaluation by ICU nurse practionor; Screening for cognitive impairment, depression, anxiety, and post-traumatic stress disorder and additiona…		In-hospital Determination by clinicians about including medication reconciliation (evaluatioin by pharmacist in addition to clinicians), education, hospital follow-up, and subspecialty referral. As need as intervention. Out-hospital A referral to a out-hospital provider for follow-up. No contained: Estimation of cognitive and functional status or anticipated post-ICU needs by a nurse practitioner…				monitoring	Yes	As need as Psychological option													Any untoward medical occurrence in a clinical investigation participant administered an intervention that does not necessarily have to have a causal relationship with this treatment a. Results in death b. Is life-threatening (defined as an event in which the participant was at risk of death at the time of the event and NOT an event that hypothetically might have caused death if it would have been…																				30	Days	Hospital discharge
Cox 2018	Adults (≥18 years) Admission to the ICU Mechanically ventilated ≥48 h Successful extubation before discharge	Preexisting or current cognitive impairment Treatment for severe mental illness during the 6 months preceding admission Residence at a location other than home immediately before admission Poor English fluency Expectation of survival less than 3 months Inability to complete study procedures Failure to return home within 3 months after discharge	Adults (≥18 years) Having an ability of dyadic therapy, which provide significant postdischarge assistance for patients.	History of cognitive impairment Poor English fluency	In-hospital No intervention. Out-hospital Telephone- and web- based coping skills training to manage stress, including cognitive restructuring and other six components. Additionaly, guidance by psychologists.		In-hospital No intervention. Out-hospital Education program about critical illness, not containing post- ICU psychological distress and how to manage it.				education	No	As need as Psychological guidance	HADS-D score 7 and more	6	Months	Hospital discharge	Within two weeks of patient arrival at home		The Impact of Events Scale–Revised (IES-R) 21 and more	6	Months	Hospital discharge	Within two weeks of patient arrival at home				HADS-A score 7 and more	6	Months	Hospital discharge	Within two weeks of patient arrival at home		EuroQoL 100-point visual analogue scale	6	Months	Hospital discharge	Within two weeks of patient arrival at home		Pain/discomfort domain of EuroQOL 100-point visual analogue scale	6	Months	Hospital discharge	Within two weeks of patient arrival at home		6	Months	Hospital discharge	Within two weeks of patient arrival at home
Cox 2019	Adults (≥18 years) Admission to the ICU ≥ 24 h Cardiorespiratory failure	Cognitive impairment Severe mental illness < 6 months Hospitalisation < 3 months of current admission Prognosis of <three months Drug abuse at admission Expectation of survival <6 months per ICU attending physician ICU length of stay ≥30 days Not expected discharge to home Expected complex medical care at soon after discharge Poor English skill Unability of either a smartphone, internet, or telep…	Adults (≥18 years) Having an ability of dyadic therapy, which provide significant postdischarge assistance for patients.	History of cognitive impairment Poor English fluency	Out-hospital Self-directed mindfulness training by mobile app; Screening weekly by the PHQ-9 and GAD-7, receiving a professional psychiatric support as need, based on questionnaire trigger points. Duration and Frecuency: From a week after hospital discharge.	Out-hospital Telephone-based mindfulness training by a psychologist; participants learn cope to adapt in the moment to address stress or crises. Duration and Frecuency: 30 min once a week for a month from a week after hospital discharge.	Educational information about the nature and treatment of critical illness, but none of the mindfulness training.				education	No	Training by psychological training Before initiation of intervention	Patient Health Questionnaire 9-item depression scale (PHQ-9) score	3	Months	Hospital discharge			The Post-Traumatic Stress Scale (PTSS)	3	Months	Hospital discharge					the Generalized Anxiety Disorder 7-item scale (GAD-7)	3	Months	Hospital discharge			EuroQOL 100-point visual analogue scale	3	Months	Hospital discharge			Pain/discomfort of EuroQOL 100-point visual analogue scale	3	Months	Hospital discharge			3	Months	Hospital discharge
Cuthbertson 2009	Adults (≥18 years) Admission to the ICU Survive until hospital discharge.	<18 years old Disablility to complete questionnaires or attend clinics No consent to participate			In-hospital and Out-hospital Self-directed rehabilitation programme Attending to clinics for ICU follow-up programme, leaded study nurse with support from an intensive care doctor. Nurses conduct standardised intervention and responds to assessment requirements as need for patients. Standarised intervention was consisted in the follow components; structured case review, discussion of experiences …		In-hospital Not details. Out-hospital Standard clinical practice with no intensive care follow-up after hospital discharge. Follow-up by their general practitioners and primary hospital specialty as indicated by these teams.				monitoring	No	As need as Psychological option	HADS-D score	12	Months	ICU discharge			The Davidson trauma score, a score of 40 or more indicates a likely diagnosis of PTSD	12	Months	ICU discharge					HADS-A score	12	Months	ICU discharge			Mental component summary of SF-36	12	Months	ICU discharge			Bodily pain of SF-36	12	Months	ICU discharge
Daly 2005	Adults Admission to the ICU. Mechanically ventilated of ≥72 h Expectation of high risk for death or prolonged hospitalization. Understanding of the English language Absence of ventilator dependency prior to the index hospitalization A hospital discharge location <80 miles from the study site	Receive organ transplants and case management by trasplant team	The person designated by the patient as the principal caregiver Adults (≥18 years) Understanding of the English language	Not stated	Disease management program by an advanced-practice nurse, who had access to physicians. In-hospital Review the hospital course, perform a baseline assessment of both the patient and the caregiver, discuss hospital discharge plans, and establish a plan of care and consult with the hospital care team, such as plan after discharge and family coping. Send to all of the relevant out-of-hospital health…		Interview for completion of study instruments by telephone. Requirement form family of patients was feedbacked to their primary care provider, extended care facility staff, or home care agency.																																							2	Months	Hospital discharge
Jensen 2016	Adults (≥18 years) Non-invasive or invasive ventilated of ≥48 h APACHE II score 12-29 No Meet criteria for baseline dementia.	Decline of Glasgow Coma Score (No orientation in personal data according to the verbal response) Detection of delirium at randomization Enrolled in other follow-up studies Not Speak and understand Danish			The individualized post-ICU recovery program of consultation which were provided by trained study nurses. In-hospital and out-hospital Approaches toward psychological recovery as follow; 1. Information by pamphlet at randomization. 2. Dialogue centerd patients and informal caregivers, which was focused with illness narratives using photographs. 3. Completing “Reflection sheets” with elements from…		In-hospital Physical rehabilitation Out-hospital Not detail.	One times (1–3 months after ICU discharge) in three post-ICU recovery program	No intervention. Questionnaire package for assessment of outcomes at 3 and 12 months					HADS-D score 11 and more	12	Months	ICU discharge			Harvard Trauma Questionnaire Part IV (HTQ-IV) score 40 and more	12	Months	ICU discharge					HADS-A score 11 and more	12	Months	ICU discharge			Mental component summary of SF-36	12	Months	ICU discharge									12	Months	ICU discharge
Jones 2003	Admission to the ICU for ≥ 48 h. Mechanically ventilated. Understanding languages. Emergency admissions Having relatives in the study	Suffering burn injury Unability to follow the manual or had language difficulties Neurosurgical patients Preexisting psychotic illness Discharged for terminal care Unlikely to survive the 6-month follow-up period	The member of the family who was to be most closely involved in the patients’ care once they are discharged home.	Not detail	In-hospital and out-hospital Routine ICU Follow-Up + Rehabilitation Package; A patient-controlled self-help rehabilitation program for 6 weeks. -Contents about psychological, psychosocial, and physical problems -Self-guided exercise program Diary about exercise Duration and Frecuency: 6 weeks from 1 week after ICU discharge		Routine ICU Follow-Up; Contacted by telephone three times once they had gone home to ask how they were getting on, and finally were seen in a dedicated ICU follow-up clinic at 8 wks and 6 months. In-hospital and Out-hospital General verbal information about recovery from ICU. Check any problems by telephone once every 2 weeks.	Mannual for relaxation and coping with stress In-hospital and Out-hospital Explanation based on a 6-week self-help rehabilitation package post ICU for patients and internal caregivers. This manual was focused on the patients’ own recovery and advice on areas such as nutrition, what to expect when the patient goes home and exercise were included. In additon, there were sections on relaxation and c…						HADS-D score 11 and more	6	Months	ICU discharge			The Impact of Events Scale greater than a cut-off 19	6	Months	ICU discharge					HADS-A score 11 and more	6	Months	ICU discharge			the Medical Health Survey Short-Form 36	6	Months	ICU discharge			Scales for pain item within SF-36	6	Months	ICU discharge
Kentish-Barnes 2017	Adults (≥18 years) Admission to the ICU Visit of caregivers prior to death ICU stay of at least 48 hours.	With pregnant Insufficient knowledge of the French language	Assigened health care providers or Relatives most communicated with the ICU team	Insufficient French language skills Refusal about participation of study	A condolence letter add to usual care. Timing: within 3 days after the patient’s death.		Usual care; Symptom control, timing of communication at the end-of-life, and implementation of treatment-limitation, decided by physicians. This study was conducted in the ICUs having considerable expertise in end- of-life care.							HADS-D score 8 and more	6	Months	Other	in the 24 hours following the death of the patient		IES-R score 26 and more	6	Months	Other	in the 24 hours following the death of the patient				HADS-A score 8 and more	6	Months	Other	in the 24 hours following the death of the patient
Kredentser 2019	Adults (≥18 years) Admission to the ICU ≥ 72 h. Mechanically ventilated. Understanding languages.	Non-availability of caregiver and family Not expected to survive 6 months after hospital discharge Cognitive impairment Reason for admission involving suicide Coma due to meningitis/encephalitis, status epilepticus, anoxic encephalopathy, traumatic brain injury, and so on			Four arms; ICU diary, psychoeducation, and ICU diary + psychoeducation Psychoeducation arms; In-hospital and out-hospital Providing pamphlet included information about common ICU proccesses and experiences (e.g., delirium); symptoms of PTSD, anxiety and depression; and follow-up/emergency resources Duration and Frecuency: 30 days after ICU discharge or after return of the ability to provide conse…	Other arms (ICU diary, ICU diary + psychoeducation)は除外なので、情報収集しない	Usual care No follow-up psychological support or education was provided.							HADS-D score 8 and more	90	Days	ICU discharge			IES-R score 1.6 and more	90	Days	ICU discharge					HADS-A score 8 and more	90	Days	ICU discharge
Moulaert 2015	Adults (≥18 years) Survived more than two weeks after an in-hospital or out-of-hospital cardiac arrest Living within 50 km of one of the participating hospitals Sufficient knowledge of the Dutch language	A life expectancy of less than three months (as estimated by the treating physician) Living in residential or institutional care prior to the cardiac arrest	A partner, spouse or significant other related to the patient closely.	There were no other inclusion or exclusion criteria.				Out-hospital Standard care + An individualized, semi-structured programme, provided by a specialized nurse Psychosocial intervention that screens for cognitive or emotional problems and offers information, advice and support, composed by obligatory and optional topics. Obligatory; Provision of Information for cognitive and emotional changes and issues, and methods of self-management. Optional; Ph…	Standard care General outpatient cardiac rehabilitation programmes This care was not specialized for cardiac arrest survivors, and did not include cognitive impairments.					HADS-D score	12	Months	Other	The cardiac arrest		IES score	12	Months	Other	The cardiac arrest										EuroQol VAS	12	Months	Other	The cardiac arrest
Schmidt 2016	Adult (≥18 years) Admission to ICU Fulfill of Two systemic inflammatory response syndrome criteria At least one organ dysfunction Sufficient knowledge of the Germany language	Insufficient language skills Deafness Blindness Speech impairment Severe cognitive impairment (a telephone interview of cognitive status ≤27 points)			In-hospital and Out-hospital Case management, telephone monitoring, and education of behavioral activation for patients, which consisted of general practitcioner, case manger and liaison physician. Educational information was included coping strategies and self-efficacy. As need as intervention based on information by case managers. Duration and Frecuency: After ICU discharge, monthly for 6 month…		In-hospital and Out-hospital No outpatient sepsis follow-up clinic. Patients were treated as usual by their practioners or ambulant specialists though any Educational information by case managers was not provided.							The Major Depression Inventory Depressive symptoms (No definition) Author reply: A cut-off at 27 points was used to allocate depressive symptoms. (PMID: 26242577からmoderate以上をカウント）	12	Months	ICU discharge			The Posttraumatic Symptom Scale -10 Symptomatic score >35	12	Months	ICU discharge											Mental component summary of SF-36	12	Months	ICU discharge			Pain intensity of the Graded Chronic Pain Scale Pain Intensity Severe pain: GCPS category >1	12	Months	ICU discharge
Valsø 2020	Admitted to the ICU. With a PTSS-10-I-B score ≥ 25 (moderate PTSS symptom) at ICU discharge.	Patients with terminal disease Severe brain injury Cognitive impairment, Severe psychiatric disorders Self-inflicted injuries or With poor Norwegian language skills			In-hospital and out-hospital Nurse-Led Follow-Up Consultations -Based on a semistructured guide with elements from trauma-related cognitive behavioral therapy (focusing on cognitive restructuring, restrictive thoughts, avoidant, and dysfunctional behavior) Duration and Frecuency: 3 times, first week after ICU discharge, 1 and 2 months later		Standard care; Early mobilization and physical therapy wherever possible and physical rehabilitation if required. Mentally disturbed patients were offered psychiatric consultations. Physical restraints are generally not used.													a PTSS-10-I-B score greater than or equal to 25.	12	Months	ICU discharge																	Brief pain inventory, measured worst pain intensity last 24 hours	12	Months	ICU discharge
Vlake 2021	Adults (>18 years) admitted to the ICU Onset of sepsis or septic shock Maximum Glasgow Coma Scale during inclusion	Cognitive impairment Pregnancy Established schizophrenia Epilepsy Documented epileptic seizures the year prior to ICU admission Known participation in another randomized controlled biomedical study Admitted after stroke, cerebral vascular accident, known hemiplegia or traumatic brain injury Admitted after drowning or drug overdose Absence of a signed informed-consent			In-hospital A virtual reality-based treatment browsing of the content using ICU-VR, which was determined by an interdisciplinary team of three intensivists, a psychologist, a psychiatrist, two ICU nurses, a post-ICU patient, a VR/film director, and a researcher. Duration and Frecuency: Between 4 and 18 days after ICU discharge. The number of desired sessions was offered daily. Out-hospital Not de…		In-hospital A static VR nature environment Out-hospital Not detail							The Beck Depression Inventory (BDI) II BDI sum score > 18 Using the last observation carried forward method; data was available from 13 patients in the control VR group and 17 patients in the ICU-VR group.	6	Months	ICU discharge			Impact of Event Scale – Revised (IES-R) IES-R sum score 24 and more Using the last observation carried forward method; data was available from 13 patients in the control VR group and 17 patients in the ICU-VR group.	6	Months	ICU discharge			Cybersickness defined as the Simulator Sickness Questionnaire estimated directly after VR initiation →outcome タブには下線部の結果を記載した Vital signs estimated heart rate, respiratory rate, oxygen saturation, and mean arterial pressure, which were measured before the intervention and during the intervention after each of the six modules A new or active delirium in the daily status report or a new administrat…								The Mental Component Scale of the Short- Form 12	6	Months	ICU discharge			Scales for pain item within SF-12	6	Months	ICU discharge
McWilliams 2016	Adults (≥18 years) Admission to the ICU Mechanically ventilated ≥5 days Understanding languages	Inability to perform a cardiopulmonary exercise test (CPET) or to participate in the rehabilitation classes Psychiatric condition or impairment not allowing informed consent or compliance with the rehabilitation program Participation in other rehabilitation program Terminal illness Poorly controlled cardiorespiratory disease			In-hospital Not detail. Out-hospital A rehabilitation program comprised by exercise and education sessions supervised by the physiotherapy team. Education sessions; Conducted in a group discussion format. Contents of benefits of exercise, relaxation techniques, managing breathlessness, smoking cessation, and anxiety management. Duration and Frecuency: Total 6 educational sessions, 1 hour per sess…		In-hospital Receiving physiotherapy, exercises, and education as per current standards of practice in their institution. Out-hospital Not providing specific input or education.																											Mental component summary of SF-36				背景の定義 として								7	Weeks	Hospital discharge
Rohr 2021	Admission to the ICU Duration of ICU stay ≥5 days Sequential organ failure assessment score greater than five at any time of the ICU stay Expected survival time greater than 6 months estimated by intensivists	Age 18 years old No gaving written informed consent (unable or unwilling) Not expected to survive 6 months after hospital discharge, are unable to complete questionnaires Have insufficient German language skills			From ICU or hospital discharge: Provide of Information and telephone contact continuously, for need of visiting follow-up clinic After 5-8 weeks from providing information: Establishment of a network At about 2 months post-ICU discharge: Assess physical, mental, cognitive and social functioning by established checklist. As need, treatment using methods reintegrating traumatic memories, by the app…		Usual care: Not giving additional information or consultation for patients and caregivers. No intensive care follow-up.							The Short Form of the Patient Health Questionnaire (PHQ-D)	6	Months	Hospital discharge			the Post-Traumatic Stress Syndrome 10-Questions Inventory (PTSS-10) >35	6	Months	Hospital discharge					The Short Form of the Patient Health Questionnaire (PHQ-D)	6	Months	Hospital discharge			The mental component scale of the Short Form-12	6	Months	Hospital discharge
Haines 2018	Adults (>18 years) Admission to the ICU ≥24 h Understanding English Receiving in phone surveys Living in the community	Unexpectation of survival or return home after discharge Cognitive impairment Psychiatric disorder Severe neurological conditions	Adults (>18 years) Admission to the ICU ≥24 h Understanding English Receiving in phone surveys Living in the community	Unexpectation of survival or return home after discharge Cognitive impairment Psychiatric disorder Severe neurological conditions Bereaved family members	In-hospital No intervention. Out-hospital Participation in peer support group by experience based co-design; Group discussion facilitaed by social worker, psychologist and so on was provided for participants. Experience of survivers was shared about specific topics (including PICS). Participants recognize these problems after ICU dicharge and share measures for improvement through discussion. Dur…		Standard Care No Peer Support Group							HADS-D >8	17	Weeks	Hospital discharge			The Impact of Events Scale Revised (IES-R) 33 and more	17	Weeks	Hospital discharge					HADS-A >8	17	Weeks	Hospital discharge			The EQ-5D-5L	17	Weeks	Hospital discharge
Ewens 2019	Patients (≥18 years) Admission to the ICU Mechanically ventilated of ≥24 h Understanding English Ability of accessing to an electronic device	Not stated			In-hospital No intervention. Out-hospital Accessing to Web-based recovery program; Advice about exercise, sleep, and nutrition. Information about the signs and symptoms of potential complications during recovery Advice about timing and method of seeking professional help, based on symptom check Encouragement to keep a journal. Duration and Frecuency: As frequently as patients wish.		In-hospital No intervention. Out-hospital Management by the participants’ general practitioner The management do not include any specific ICU aftercare provision, for instance, follow-up by the ICU team.							HADS	12	Months	Hospital discharge			IES-R	12	Months	Hospital discharge					HADS	12	Months	Hospital discharge			EQ5D-5L	12	Months	Hospital discharge
Khan 2018	Patients (≥18 years) Admission to the ICU Diagnosed with acute respiratoy failure with need of mechanically ventilated of ≥24 h Discharge from hospital Understanding English Ability to consent	Diagnosis of cancer with life expectancy less than 1 year Cognitive impairment and Neurological Disorders Admission with ischemic or hemorrhagic stroke, trau- matic brain injury (based on the treating physicians’ notes or evidence of brain injury on neuroimaging), or undergoing neurosurgery Deafness Blindness Pregnancy Living outside the greater Indianapolis area Alcohol or drug abuse Speech impa…			Critical care recovery program consisted in contact between the care coordinator, patient, and informal caregiver via face-to-face home or clinic visit, phone contact, email, fax, or mail. The care coordinator provodes care protocol developed by the interdisciplinary team, which contains depression, anxiety, agitation or aggression, delusions or hallucinations, caregiver stress/physical health,a …		A guide for ICU survivors containing phone num- bers for relevant community resources, education on caregiver coping skills, and legal and financial advice.							HADS PHQ-9	12	Months	Hospital discharge			PTSS-10	12	Months	Hospital discharge					HADS GAD-7	12	Months	Hospital discharge			SF-36 MCS	12	Months	Hospital discharge
Boehm 2019	Patients (≥18 years) Admission to the ICU Diagnosis of sepsis or acute respiratory distress syndrome Expectation to survial	No use computer, electronic device (e.g., tablet, smartphone) Unaccess to internet connection for virtual clinic visit Primary care received outside of this network Hospice care at discharge Drug abuse Psychiatric disorder Deafness Blindness Unable to speak English Severe dementia prior to index hospitalization			interdisciplinary telehealth ICU recovery care, which include case managememt to assess and manage PICS Duration and Frecuency: Two times at three weeks and three months after hospital discharge 90 minutes per one telehealth visit		Receiving an electronic PICS guide for ICU survivors created by the Society of Critical Care Medicine. Patients access information provided in the PICS guide. This electronic PICS guide do not provide monoitor, case management, and psychoeducation.							the PROMIS Depression v1.0	6	Months	Hospital discharge			The PTSD Checklist for DSM-5 (PCL-5)	6	Months	Hospital discharge					The PROMIS Anxiety v1.0	6	Months	Hospital discharge			The PROMIS Global Short Form v1.1	6	Months	Hospital discharge
Ojeda 2021	SARS-CoV-2 infection, confirmed with a respiratory tract sample using PCR-based tests Acute Physiology And Chronic Health Evaluation score >14 ICU stay over 10 days Acquisition of weakness in ICU Delirium during ICU [14] (Supplement Definition Acceptance to participate in the study by signing the informed consent form	Non-confirmed SARS-CoV-2 infection according to WHO guidance Central ervous system degenerative diseases Terminal illness Insufficient understanding of the Spanish language Difficulty to complete follow-up Absence of a signed informed-consent			The intervention consists of a program that includes early patient care, therapeutic education about PICS and pain, and psychological intervention. Psychologcal intervention was conducted for patients a score higher than 8 on the hospital anxiety and depression (HAD) test depression subscale Duration and Frecuency: 3 times visits at Four-six, eight, and 18 weeks after hospital discharge Psycholog…		Patient follow-up, which was carried out by their referring physicians (primary care physicians or specialists)							HADS-D score 8 and more	6	Months	Hospital discharge			The post-traumatic stress disorder checklist questionnaire (PCL-5)	6	Months	Hospital discharge			Worsening of patients’ clinical course (overdose, self-harm, and self-harm attempts)		HADS-A score 8 and more	6	Months	Hospital discharge			The EuroQoL 100-point visual analogue scale	6	Months	Hospital discharge			The Brief Pain Inventory (BPI) questionnaire	6	Months	Hospital discharge
Cox 2020b	Adults (≥18 years) Managed in a hospital setting for ≥24 hours Acute cardiorespiratory failure / insufficiency Cognitive status intact Absence of severe and/or persistent mental illness Understanding English Elevated baseline psychological distress symptoms at hospitaldischarge	Complex medical care expected soon after discharge Unable to complete study Lack of Access to mobile devices Failure to randomize within 2 months post-discharge Failure to access app within 1 month after randomization			Coping skills training mobile app with call from coping-skills-training (CST) therapist A program based on coping skills training by a mobile app. Plus A brief relaxation exercise by CST therapist	Coping skills training mobile app only A program based on coping skills training by a mobile app. "The app contains video, visual, and text content and has a companion PDF workbook. It provides timeline-driven prompts to complete weekly tasks (e.g., viewing videos, completing surveys) and coaching participants to use their current stressors as context for real-life application of adaptive coping …	Providing safety oversight							A visual analog scale (1-100) appended to the HADS-D	3	Months	ICU discharge			A visual analog scale (1-100) appended to the Post-Traumatic Stress Symptom inventory (PTSS)	3	Months	ICU discharge					A visual analog scale (1-100) appended to the HADS-A	3	Months	ICU discharge			A visual analog scale (1-100)	3	Months	ICU discharge
Malik 2018	Adults (≥18 years) Admission to the ICU >24 hr Living at home before the current admission Acute respiratory failure At least mild depressive symptoms	Pre-existing cognitive impairment Declines informed consent or not capable of providing informed consent Non-English speaking Homelessness or living >50 miles away from study site Bedbound prior to the current admission Expected survival <6 months according to ICU attending ICU Length Of Stay (LOS) >30 days Not discharged home from the hospital Complex medical care expected soon after discharge A…			Physical rehabilitation combining behavioral activation (an evidence-based psychological treatment for depression). Check of weekly goal by home vist or phone and action plans. Duration and Frecuency: After within one week after hospital discharge		Usual care, not stated							HADS-D score≥8	12	Weeks	Hospital discharge			Impact of Events Scale - Revised (IES-R)	3	Months	Hospital discharge					HADS-A score≥8	12	Weeks	Hospital discharge			The EuroQoL 100-point visual analogue scale	12	Weeks	Hospital discharge
Gawlytta 2020	Adults (≥18 years) Admission to the ICU >5 days Sepsis Pass of one month after ICU discharge PTSD diagnosis one of dyads	Not having a spouse Acute psychosis Suicidal ideation Use of neuroleptics Not being uent in German Ongoing psychotherapeutic treatment	Adults (≥18 years) PTSD diagnosis one of dyads	Acute psychosis Suicidal ideation Use of neuroleptics Not being uent in German Ongoing psychotherapeutic treatment	With PTSD diagnosis The internet-based cognitive- behavioral writing therapy, consisted in three issues; resource-oriented biographical reconstruction, in sensu trauma exposure sessions, ansd cognitive reconstruction Receiving a supportive letter Duration and Frecuency: Four weeks from at least one month form ICU discharge 50 minutes per week Without PSTD diagnosis The psychoeducational informati…		Receiving iCBT after five weeks that the intervention group received iCBT	The same intervention to patients	The same intervention to patients
Chen 2022	Adults (≥18 years) Admission to the ICU ≥12 hours No history of cognitive impairment Absence of severe and/or persistent mental illness	Undergo complex medical care again in the near future Unable to complete the study procedures Participating in other clinical trials within the past 1month			mindfulness-based stress reduction (MBSR) training on the basis of nursing program and health education In-hospital Initiated from 24 hour which transferred from ICU to the general ward, consisting of 2 responsible nurses, 4 specialist nurses, 1 psychologist, and 2 attending physicians, which sepcial treainings. Training contained Body scan training, Mindfulness breathing training, Mind change aw…		Co-intervention: Nursing program and health education, including disease knowledge introduction, medication guidance, diet guidance, rehabilitation training and so on.							Self-rating Depression Scale	3	Months	ICU discharge											Self-rating Anxiety Scale	3	Months	ICU discharge
Friedman 2022	Patients (≥18 years) Admission to the ICU Mechanically ventilated of ≥3 days Expectation of survival in an area near the participating center Acceptance to participate in the study by signing the informed consent form	Hospitalization in an ICU in the previous year Pre-existing chronic myopathy Admittion for serious burns, severe brain injury, suicide, or self-induced poisoning Comorbility of psychiatric disorder or dementia Under guardianship Not speak fluent French Homeless Pregnancy			Post-ICU consultation by physician, psychologist, and social worker. the psychologist consisted of the collection of the Hospital Anxiety and Depression Scale (HADS) and Impact Event Scale-Revised (IES-R) scores for assessing PTSD as well as an interview during which the participant reported any psychological difficulties. The consultation with the social worker consisted of the collection of the…		No additional post-ICU consultation							HADS	12	Months	ICU discharge			Impact of Events Scale - Revised (IES-R)	12	Months	ICU discharge					HADS	12	Months	ICU discharge			SF-36 MCS	12	Months	ICU discharge

## Sheet: Study characteristic
		study period				follow-up period						age of intervention group												Age of control group													Sample size
Study ID	Country	dr_Year_start	dr_Month_start	dr_Year_finish	dr_Month_finish	dsf	dsf_Unit	Timing of follow-up	Detail_other_timing or note		Arm_intervention1	Age_I_Mean	Age_I_SD	Age_I_95%CI_Lower	Age_I_95%CI_Upper	Age_I_Median	Age_I_IQR_Lower	Age_I_IQR_Upper	Age_I_Min	Age_I_Max	Age_I_other renge	Age_I_other renge_Lower	Age_I_other renge_Upper	Age_C_Mean	Age_C_SD	Age_C_95%CI_Lower	Age_C_95%CI_Upper	Age_C_Median	Age_C_IQR_Lower	Age_C_IQR_Upper	Age_C_Min	Age_C_Max	Age_C_other renge	Age_C_other renge_Lower	Age_C_other renge_Upper		SS_planed_total	Ratio of allocation	Ratio of allocation_detail_other	SS_allocation_I	Missing_I	Death_I	SS_last time point_I	SS_allocation_C	Missing_C	Death_C	SS_last time point_C	Attrition
Abdelhamid 2021	Australia	2016	2	2017	8	6	Months	Hospital discharge				64	11											68	8												206	I:C=1:1		21	3	4	14	21	2	7	12	38.0952
Ågren 2018	The Kingdom of Sweden	2013	Not stated	2015	Not stated	12	Months	ICU discharge																																								#DIV/0!
Bloom 2019	The United States of America	2017	5	2017	10	30	Days	Hospital discharge	Including hospitalization							56	44	67										56	48	66							550	I:C=1:1		145	0	38	107	157	0	45	112	27.4834
Cox 2018	The United States of America	2013	12	2015	4	6	Months	Hospital discharge	Within two weeks of patient arrival at home			49.7	13.8											53.7	13.5												190	I:C=1:1		86	18	6	62	89	14	6	69	25.1429
Cox 2019	The United States of America	2016	3	2017	2	3	Months	Hospital discharge			Self-directed mindfulness training by mobile app	48.7	15.3											53.3	12.6												90	Other	3 arms	31	9	Not stated	22	18	2	Not stated	16	22.449
Cuthbertson 2009	The United Kingdom	2006	9	2007	10	12	Months	Hospital discharge								59	46	49										60	46	71							270	I:C=1:1		143	33	18	92	143	29	14	100	32.8671
Daly 2005	The United States of America	2001	3	2004	12	2	Months	Hospital discharge	Readmissionのアウトカムデータのみ使用する			60.7	16.6	58.7	62.9									61.4	16.1	58.3	64.6										256	Other	Change from a 1:1 to a 1:4 after 18 months of the trial	231	8	43	180	103	16	20	67	26.0479
Jensen 2016	Denmark	2012	12	2015	12	12	Months	ICU discharge								66	57.75	73.5										67.5	58	75							380	I:C=1:1		190	38	36	116	196	34	43	119	39.1192
Jones 2003	The United Kingdom	Not stated	Not stated	Not stated	Not stated	6	Months	ICU discharge				57	17			53			17	77				59	16			61			17	84					150	I:C=1:1		69	6	5	58	57	8	5	44	19.0476
Kentish-Barnes 2017	France	2014	12	2015	12	6	Months	Other	in the 24 hours following the death of the patient							61	54	71										61	54	66																		#DIV/0!
Kredentser 2019	Canada	2014	5	2016	11	90	Days	ICU discharge				54.3	17.7											49.9	16.9												Not stated	Other	4 arms	14	5	3	5	14	3	5	6	60.7143
Moulaert 2015	Netherlands	2007	4	2010	12	12	Months	Other	Cardiac arrest			60	12											60	12												200	I:C=1:1		97	21	NA	76	88	21	NA	67	22.7027
Schmidt 2016	Germany	2011	2	2013	12	12	Months	ICU discharge				62.1	14.1											61.2	14.9												290	I:C=1:1		148	14	27	107	143	21	27	95	30.5842
Valsø 2020	Kingdom of Norway	2014	3	2016	12	12	Months	ICU discharge				53	16											50	18												134	I:C=1:1		111	20	8	83	113	21	4	88	23.6607
Vlake 2021	Netherlands	2017	11	2019	12	6	Months	ICU discharge	Stop temporaly from May to December 2018 for the transition to large hospital to improve slow inclusion							61					95% renge	23	75					59					95% renge	59	80		50	I:C=1:1		25	2	2	23	25	4	2	19	16
McWilliams 2016	The United Kingdom	2007	10	2011	12	7	Weeks	Hospital discharge				55	12.9											60.8	12.3												100	I:C=1:1		37	6	1	30	36	3	0	33	13.6986
Rohr 2021	Germany	2019	12	2020	10	6	Months	Hospital discharge	Recruitment Status: Recruiting、組み入れ期間はplan																												100	I:C=1:1
Haines 2018	Australia	2018	4	2018	11	17	Weeks	Hospital discharge	Recruitment Status: Recruiting、組み入れ期間はplan																												60	I:C=1:1
Ewens 2019	Australia	2018	11	2020	12	12	Months	Hospital discharge	Recruitment Status: Recruiting、組み入れ期間はplan																												162	I:C=1:1
Khan 2018	The United States of America	2017	3	2022	2	12	Months	Hospital discharge	Recruitment Status: Recruiting、組み入れ期間はplan																												620	I:C=1:1
Boehm 2019	The United States of America	2019	11	2021	12	6	Months	Hospital discharge	Recruitment Status: Recruiting、組み入れ期間はplan																												120	I:C=1:1
Ojeda 2021	Spain	2020	5	2020	9	6	Months	Hospital discharge	Recruitment Status: Recruiting、組み入れ期間はplan																												102	I:C=1:1
Cox 2020b	The United States of America	2020	12	2021	10	3	Months	Hospital discharge	Recruitment Status: Recruiting、組み入れ期間はplan																												45	I:C=1:1
Malik 2018	The United States of America	2018	3	2022	6	12	Weeks	Hospital discharge	Recruitment Status: Recruiting、組み入れ期間はplan																												54	I:C=1:1
Gawlytta 2020	Germany	2017	2	2019	1	1	Months	ICU discharge	At least 1 month after discharge from the ICU																															12				13
[truncated: 379 more columns]

## Sheet: Outcomes
Study ID	Arm_intervention1	Intervention sample size	Depression_I_Numner of patients	Depression_I_Mean	Depression_I_estimated Mean	Depression_I_SD	Depression_I_SE	Depression_I_estimated SD	Depression_I_95%CI_Lower	Depression_I_95%CI_Upper	Depression_I_Median	Depression_I_IQR_Lower	Depression_I_IQR_Upper	Depression_I_Min	Depression_I_Max	Depression_I_other renge	Depression_I_other renge_Lower	Depression_I_other renge_Upper	Control sample size	Depression_C_Numner of patients	Depression_C_Mean	Depression_C_estimated Mean	Depression_C_SD	Depression_C_SE	Depression_C_estimated SD	Depression_C_95%CI_Lower	Depression_C_95%CI_Upper	Depression_C_Median	Depression_C_IQR_Lower	Depression_C_IQR_Upper	Depression_C_Min	Depression_C_Max	Depression_C_other renge	Depression_C_other renge_Lower	Depression_C_other renge_Upper	Depression_mean diference between groups	Depression_mean diference between groups_95%CI_Lower	Depression_mean diference between groups95%CI_Upper	2	Intervention sample size	PTSD_I_Numner of patients	PTSD_I_Mean	PTSD_I_estimated Mean	PTSD_I_SD	PTSD_I_SE	PTSD_I_estimated SD	PTSD_I_95%CI_Lower	PTSD_I_95%CI_Upper	PTSD_I_Median
Abdelhamid 2021		14	7																12	7
Ågren 2018		0																	0
Bloom 2019		107																	112
Cox 2018		62		7			0.6	4.7244											69		7.2			0.6	4.98397															62		29.4			2.9	22.8346
Cox 2019	Self-directed mindfulness training by mobile app	22		3.4			0.9	4.22137											16		4			1.1	4.4															22		19.6			2.1	9.84987
Cuthbertson 2009		105		5.3		4.3													115		5.3		4
Daly 2005		180																	67
Jensen 2016		190	14																196	16																-0.2	-1.12	0.72		190	32
Jones 2003		58	6																44	5																					31
Kentish-Barnes 2017		0																	0
Kredentser 2019		5			5			3.7037			5	4	9						6			4.5			3.7037			4.5	2	7
Moulaert 2015		76																	67
Schmidt 2016		107	7																95	2																					13
Valsø 2020		83																	88																				Y	83		31				13.9445	28	34
Vlake 2021		23	3		4			28.1388			4					95% range	0	23	19	6		10			35.5828			10					95% range	2	34					23	2		5			42.8199			5
McWilliams 2016		30																	33
Rohr 2021
Haines 2018
Ewens 2019
Khan 2018
Boehm 2019
Ojeda 2021
Cox 2020b
Malik 2018
Gawlytta 2020
[truncated: 456 more columns]

## Sheet: Code
Item	Detail	List
AE	All adverse events
C	Control
dr	Duration of recruitment
dsf	Duration of study follow-up
F	Familiy
FO#	Familiy outcome numbering
I	Intervention
PO#	Patient outcome numbering
SD	Standard deviation
SE	Standard error
SS_allocation	Sample size at allocation
SS_last time point	Sample size at last time point of study
Unit_Measured time point	List, units	Years	Months	Weeks	Days
Depression_Measured time point	Longest follow-up period, numeric
Country	Country conducted studies
Timing of follow-up	List, initiation-timing of interveniton	ICU discharge	Hospital discharge	Other
Ratio of allocation	List of allocation	I:C=1:1	Other
Arm_intervention#	category of interveniton
